# Supplementary material
Source: MDPI journal article supplement (https://www.mdpi.com/2073-4395/12/4/930)

## Supplementary Information

**Table S1:** Crop Coefficients for different stages of peanut.

| Stages           | Period                         | Crop Coefficient ( $K_c$ ) |
|------------------|--------------------------------|----------------------------|
| Pre -bloom stage | 5 to 10 days after planting    | 0.45                       |
| Crop development | 25 to 40 days after planting   | 0.75                       |
| Mid-season       | 40 to 100 days after planting  | 1.025                      |
| Late-season      | 100 to 130 days after planting | 0.75                       |

**Table S2:** Peanut yield for the major counties in Georgia (pound per acre).

| Crop-year    | Seminole    | Irwin | Early       | Miller | Mitchell    | Decatur | Worth | Colquitt    |
|--------------|-------------|-------|-------------|--------|-------------|---------|-------|-------------|
| Peanut- 2007 | 3825        | 2945  | 3000        | 3705   | 3225        | 3635    | 3090  | 2970        |
| Peanut- 2008 | 4405        | 3240  | 3880        | 4115   | <b>3765</b> | 4045    | 2995  | 3565        |
| Peanut -2009 | 4460        | 3025  | 3965        | 4785   | <b>4040</b> | 4530    | 3390  | 3675        |
| Peanut -2010 | 4534        | 3614  | 3084        | 4448   | 4240        | 4493    | 3461  | 3843        |
| Peanut -2011 | 4797        | 2932  | <b>3880</b> | 4647   | 4153        | 5053    | 3359  | <b>3880</b> |
| Peanut -2012 | 5656        | 4273  | 5192        | 5398   | 4661        | 4950    | 4288  | 4676        |
| Peanut -2013 | 5123        | 4329  | 4949        | 5198   | 5046        | 5113    | 4473  | 5113        |
| Peanut -2014 | 5491        | 3747  | 4664        | 5068   | 4716        | 5473    | 4076  | 4551        |
| Peanut -2015 | <b>4303</b> | 4679  | 4382        | 4978   | 5093        | 5284    | 4093  | 4349        |
| Peanut -2016 | 4673        | 3826  | 4381        | 4892   | <b>4469</b> | 4896    | 3328  | 4200        |
| Peanut -2017 | 5112        | 4416  | 4686        | 4947   | 4856        | 5127    | 3870  | 4445        |

**Table S3:** Water solubility of pesticides.

| Pesticide          | Water solubility |
|--------------------|------------------|
| Azoxystrobin       | 6.7mg/l          |
| Flutolanil         | 8.01 mg/l        |
| Chlorothalonil     | 10mg/100l        |
| Cyproconazole      | 93mg/l           |
| Difenoconazole     | 15mg/l           |
| Fludioxonil        | 1.8mg/l          |
| Flutolanil         | 8.01mg/l         |
| Mancozeb           | 6.2mg/l          |
| Propiconazole      | 100mg/l          |
| Tebuconazole       | 0.032g/l         |
| Thiophanate methyl | 26.6mg/l         |
| 2,4-D              | 45000mg/l        |
| 2,4-DB             | 46mg/l           |
| Acifluorfen        | 62g/100ml        |
| Bentazone          | 7712mg/l         |
| Clethodim          | 5450mg/l         |
| Ethalfuralin       | 0.01mg/l         |

|                   |               |
|-------------------|---------------|
| Paraquat          | 70g/100ml     |
| Pendimethalin     | 0.275mg/l     |
| Metolachlor       | 480mg/l       |
| Sethoxydim        | 4700mg/l      |
| Trifluralin       | 0.0024g/100ml |
| Diquat            | 100µg/ml      |
| Cyfluthrin        | 2 µg/ml       |
| Diflubenzuron     | 0.08mg/l      |
| Esfenvalerate     | 0.001mg/l     |
| Imidacloprid      | 0.61g/l       |
| Zeta Cypermethrin | 0.05mg/l      |
| Phorate           | 50mg/l        |

**Table S4:** Pesticides susceptible to leaching and runoff.

| <b>Leaching</b>                                  | <b>Runoff</b>                                           |
|--------------------------------------------------|---------------------------------------------------------|
| Azoxystrobin                                     | Flutolanil                                              |
| ciproconazole                                    | Chlorothalonil (deposition)                             |
| Propiconazole                                    | Fludioxonil                                             |
| 2,4-D                                            | Flutolanil                                              |
| Acifluorfen                                      | Propiconazole                                           |
| Clethodim (degradation by sunlight and microbes) | Tebuconazole                                            |
| Metolachlor                                      | Thiophanate methyl                                      |
|                                                  | 2,4-DB                                                  |
|                                                  | Acifluorfen                                             |
|                                                  | Bentazone                                               |
|                                                  | Ethalfuralin (erosion)                                  |
|                                                  | Paraquat                                                |
|                                                  | Pendimethalin                                           |
|                                                  | Metolachlor                                             |
|                                                  | Sethoxydim (neither leach nor runoff, photodegradation) |
|                                                  | Trifluralin (runoff, volatilization)                    |
|                                                  | Acephate (water soluble)                                |
|                                                  | Bifenthrin                                              |
|                                                  | Chlorpyrifos                                            |
|                                                  | Cyfluthrin                                              |
|                                                  | Diflubenzuron (eroded soil with runoff)                 |
|                                                  | Esfenvalerate                                           |
|                                                  | Imidachloprid                                           |
|                                                  | Zeta Cypermethrin                                       |
|                                                  | Phorate                                                 |

Figure S1: Crop-specific (peanut) characterization factor from Boulay et al. 2019.

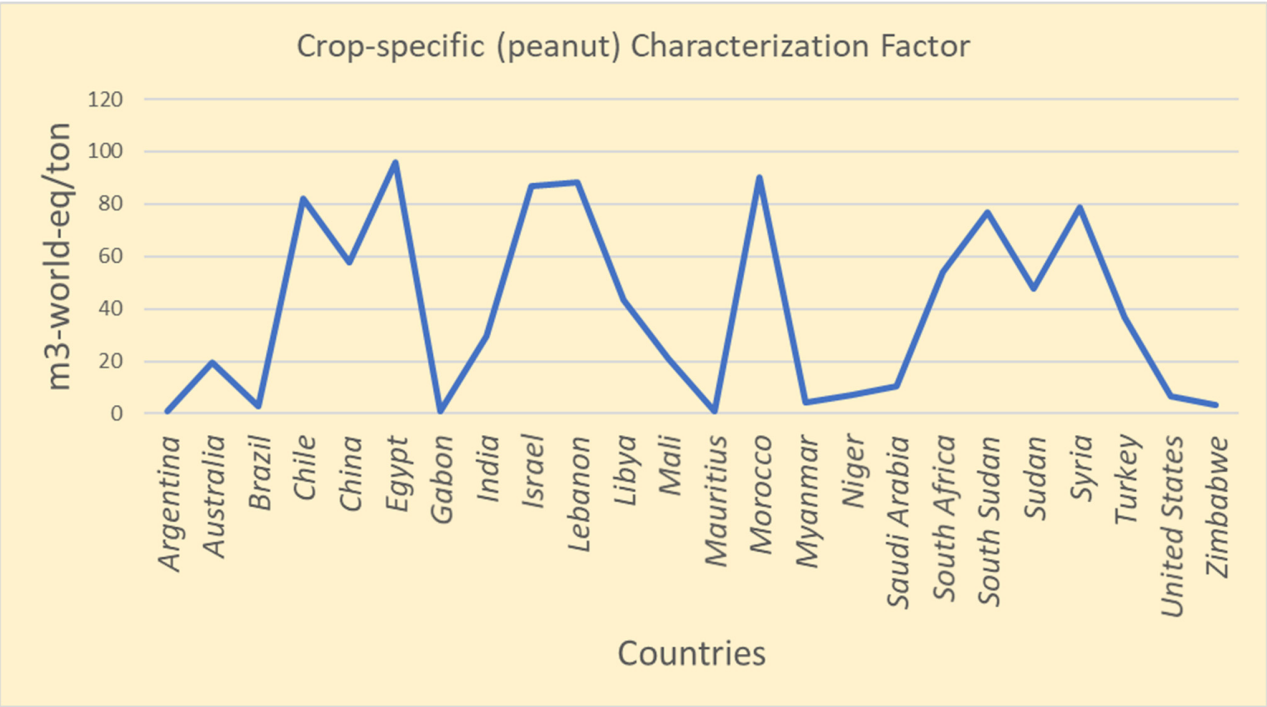

Supplement: s1 [file s1]
